# Supplementary material for: Role of route previewing strategies on climbing fluency and exploratory movements
Source: PLoS One. 2017 Apr 25;12(4):e0176306. doi: 10.1371/journal.pone.0176306 (PMC5404847; doi:10.1371/journal.pone.0176306)
Supplement: S2 File — (XLSX) [file pone.0176306.s002.xlsx]

## Sheet: Feuil1
Hold number	X	Y
1	4.40476	22.0417
2	19.0873	133.719
3	39.6429	22.0417
4	95.4365	151.353
5	93.9683	130.781
6	92.5	20.5722
7	168.849	132.25
8	179.127	16.1639
9	240.794	182.211
10	249.603	155.761
11	258.413	14.6944
12	289.246	82.2889
13	325.952	45.5528
14	336.23	111.678
15	339.167	170.456
16	300.992	205.722
17	240.794	218.947
18	330.357	254.214
19	309.802	271.847
20	281.905	320.339
21	284.841	360.014
22	242.262	415.853
23	323.016	420.261
24	214.365	499.611
25	281.905	502.55
26	340.635	502.55
27	240.794	564.267
28	321.548	565.736
29	280.437	603.942
30	311.27	678.883
31	252.54	731.783
32	296.587	794.969
33	246.667	839.053
34	346.508	843.461
35	234.921	908.117
36	295.119	911.056
37	353.849	908.117
38	258.413	975.711
39	337.698	978.65
40	278.968	1055.06
